# Supplementary material
Source: MDPI journal article supplement (https://www.mdpi.com/2311-5637/10/5/250)
Supplement: s1 [file s1]

## **Supplementary materials**

### **High-level Bio-Based Production of Coproporphyrin in *Escherichia coli***

**Bahareh Arab, Adam Westbrook, Murray Moo-Young, Yilan Liu, C. Perry Chou\***

Department of Chemical Engineering

University of Waterloo

Waterloo, Ontario, Canada N2L 3G1

\* Corresponding author:

C. Perry Chou

Department of Chemical Engineering

University of Waterloo

200 University Avenue West

Waterloo, Ontario, Canada N2L 3G1

E-mail: cpchou@uwaterloo.ca

Telephone: 1-519-888-4567 ext. 33310

## **Materials and methods**

### **Bacterial strains and plasmids**

Plasmid pK-hemABCD was used from our previous study to serve as the template for the remaining plasmids [1]. Briefly, the *hemA* gene was amplified by polymerase chain reaction (PCR) from the genomic DNA of *Rhodobacter sphaeroides* DSM 158 using primers P001/P002. Similarly, *hemB*, *hemC*, and *hemD* genes were amplified from the genomic DNA of *Escherichia coli* MG1655 using primer sets P003/P004, P005/P006, and P007/P008, respectively. The backbone, consisting of p15A ori and *trc* promoter with a kanamycin resistance marker, was amplified from a lab-made plasmid using primers P009/P010. Subsequently, these five fragments were Gibson-assembled to construct pK-hemABCD.

pK-hemABD was constructed by amplifying *hemA* and *hemB* using primers P001/P004 and amplifying *hemD* along with the backbone using primers P017/P018 and pK-hemABCD as template. These two fragments were Gibson-assembled to form pK-hemABD.

**Table S1:** Oligomers used in this study

| Primers/oligo name | Primer/oligo sequence (5' → 3')                  |
|--------------------|--------------------------------------------------|
| P001               | AAGGAGGAATAGAAAATGGACTACAATCTGGCACTCG            |
| P002               | TTTCGTACCTCCTTTGCTAGCTCAGGCAACGACCTCGGC          |
| P003               | CTAGCAAAGGAGGTACGAAATATGACAGACTTAATCCAACGC       |
| P004               | ATGTAAATTCCTCCTTTGGTACCTTAACGCAGAATCTTCTTCTCAG   |
| P005               | CCAAAGGAGGAAATTTACATGTTAGACAATGTTTTAAGAATTGCCAC  |
| P006               | TAATAATCCTCCTTTGCATGCTCATGCCGGGGCGTCTCC          |
| P007               | CATGCAAAGGAGGATTATTATATGAGTATCCTTGTCACCC         |
| P008               | CTGCGGATCCTTATTGTAATGCCCCGTAAAAGC                |
| P009               | ATTACAATAAGGATCCGCAGCCCGCCTAATG                  |
| P010               | TCCATTTTCTATTCTCCTTTAATTGTTATCCGCTC              |
| P011               | GTATCACCGCTAAGGATCCGCAGCCCGCCTAATGAGC            |
| P012               | TTTCGGATGTTATTGTAATGCCCCGTAAAAGCGCATCG           |
| P013               | GGAATCAATAATGACCGAACTTAAAAACGATCG                |
| P014               | CATCGACTGTCTGAACAGTATCACCGCTAAGGATCCG            |
| P015               | CGGGCATTACAATAACATCCGAAAAGAATGATGGATC            |
| P016               | TTAAGTTCGGTCATTATTGATTCCTCCTTTAATTGG             |
| P017               | TACCAAAGGAGGAAATTTACATGAGTATCCTTGTCACCCG         |
| P018               | GTCCATTTTCTATTCTCCTTTAATTGTTATCCG                |
| P019               | TCTTTTCGGATGTTAACGCAGAATCTTCTTCTCAG              |
| P020               | TCTGCGTTAACATCCGAAAAGAATGATGG                    |
| P021               | GGATACTCATTATTGATTCCTCCTTTAATTGGG                |
| P022               | GGAGGAATCAATAATGAGTATCCTTGTCACCCG                |
| P023               | AAATTTCTCCTTTGGTACCTTATTGTAATGCCCCGTAAAAGCGCATCG |
| P024               | GGTACCAAAGGAGGAAATTTACATGACCGAACTTAAAAACGATCG    |
| P025               | TTGAATTTTCTCCTTTTTCATGATTAGCGGTGATACTGTTTCAG     |
| P026               | TGAAAAGGAGGAAAATTCAATGAGTGACGGCAAAAAACATG        |
| P027               | CTGCGGATCCTTAGCTGAATAAATAGGTAAGCG                |
| P028               | TTATTTCAGCTAAGGATCCGCAGCCCGCCTAATGAG             |
| P029               | GTCCATTTTCTATTCTCCTTTAATTGTTATCCGC               |
| P030               | TGAAAAGGAGGAAAATTCAATGCTAAAAGTGTTATTGCTCTTTGTG   |
| P031               | CTGCGGATCCCTACTGTGGCGGGTTATTCTGC                 |
| P032               | GCCACAGTAGGGATCCGCAGCCCGCCTAATGAGC               |
| P033               | CAATTAAAGGAGGAATAGAAAATGGAC                      |
| P034               | TTTCTATTCTCCTTTAATTGTTATCCG                      |

## References

1. Arab, B.; Westbrook, A.W.; Moo-Young, M.; Liu, Y.; Chou, C.P. Bio-Based Production of Uroporphyrin in *Escherichia coli*. *Synthetic Biology and Engineering* **2024**, *2*, 10002.
